# Supplementary material for: SLE non-coding genetic risk variant determines the epigenetic dysfunction of an immune cell specific enhancer that controls disease-critical microRNA expression
Source: PubMed Central journal article supplement (PMC7794586; doi:10.1038/s41467-020-20460-1), 2021-01-08
Supplement: 41467_2020_20460_MOESM9_ESM.pdf [file 41467_2020_20460_MOESM9_ESM.pdf]

**Title: Supplementary Data 1:**

Description: Discovery cohort and replication cohort study summary.

**Title: Supplementary Data 2:**

Description: DESeq2 results for all variants in MPRA experiment.

**Title: Supplementary Data 3:**

Description: Differential gene expression between WT group and KO group.

**Title: Supplementary Data 4:**

Description: Proteins binding with random and DNA sequence harboring rs2431697 identified by MS study.

**Title: Supplementary Data 5:**

Description: 4C-seq identified the interaction TSS regions with rs2431697 locus.

**Title: Supplementary Data 6:**

Description: miR-146a targets predicted by TargetScan, mirTarBase and miRDB.
